# Supplementary material for: Molecular design of anticancer drugs from marine fungi derivatives
Source: PubMed Central journal article supplement — RSC Adv. 2021 Jun 4;11(33):20173–9. doi: 10.1039/d1ra01855h (PMC9033662; doi:10.1039/d1ra01855h), 2021-06-04

Supporting Information:

# Molecular Design of Anticancer Drug from Marine Fungi Derivatives

Duc Tuan Cao,<sup>a</sup> Thi Mai Huong Doan,<sup>b,c</sup> Van Cuong Pham,<sup>b,c</sup> Thi Hong Minh Le,<sup>b</sup> Jung-Woo Chae,<sup>d</sup> Hwi-yeol Yun,<sup>d</sup> Min-Kyun Na,<sup>d</sup> Young-Ho Kim,<sup>d</sup> Minh Quan Pham,<sup>c,e\*</sup> and Van Hung Nguyen<sup>a\*</sup>

<sup>a</sup>Hai Phong University of Medicine and Pharmacy, Haiphong, Vietnam; Email: nvhung@hpmu.edu.vn

<sup>b</sup>Institute of Marine Biochemistry, Vietnam Academy of Science and Technology, Hanoi, Vietnam

<sup>c</sup>Graduate University of Science and Technology, Vietnam Academy of Science and Technology, Hanoi, Vietnam

<sup>d</sup>College of Pharmacy, Chungnam National University, Daejeon, Republic of Korea

<sup>e</sup>Institute of Natural Products Chemistry, Vietnam Academy of Science and Technology, Hanoi, Vietnam

Email: nvhung@hpmu.edu.vn and minhquanaries@gmail.com

Table S1. The list of marine compounds and docking results.

| N <sup>o</sup> | ID | Structure                                                                           | ChemPLP |
|----------------|----|-------------------------------------------------------------------------------------|---------|
| 1              | 48 | 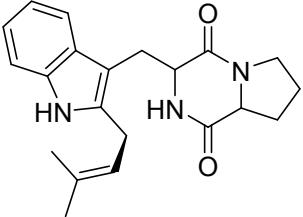   | 86.33   |
| 2              | 25 |    | 77.8    |
| 3              | 40 |    | 76.9    |
| 4              | 23 |   | 72.58   |
| 5              | 46 |  | 71.73   |
| 6              | 52 |  | 70.55   |

|    |    |                                                                                                                                                                          |       |
|----|----|--------------------------------------------------------------------------------------------------------------------------------------------------------------------------|-------|
| 7  | 3  | 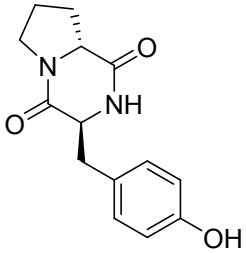 <chem>Oc1ccc(cc1)CC2C(=O)NCC2=O</chem>                                                 | 68.9  |
| 8  | 41 |  <chem>CC(C)C=C[C@H]1CC[C@@H]2[C@@]1(CC[C@H]3[C@H]2CC=C4[C@@]3(CC[C@@H](C4)O)C)C</chem> | 68.61 |
| 9  | 1  |  <chem>O[C@@H]1CCN(C1)C(=O)C2=CC=CC=C2</chem>                                           | 67.97 |
| 10 | 45 |  <chem>COc1ccc2c(c1)c3c(c2)nc4c3c5c(c4)nc(=O)n5</chem>                                 | 67.45 |
| 11 | 13 |  <chem>C1=CC=C2C(=C1)N=C(C2)c3c[nH]c4ccccc34</chem>                                   | 67.1  |
| 12 | 35 |  <chem>CC1=C(O)C(=O)OC(=C1)C=C</chem>                                                 | 67.05 |

|    |      |                                                                                                                                                                                   |       |
|----|------|-----------------------------------------------------------------------------------------------------------------------------------------------------------------------------------|-------|
| 13 | 6    | 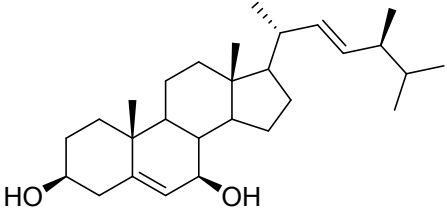 <chem>CC(C)C=C[C@H](C)C[C@H]1CC[C@@H]2[C@@]1(CC[C@H]3[C@H]2CC=C4[C@@]3(CC[C@@H](C4)O)C)C</chem> | 66.49 |
| 14 | 22   |  <chem>C1CCN(C1)C(=O)N[C@@H](C1=CC=CC=C1)C(=O)N1CCCC1</chem>                                     | 66.32 |
| 15 | MG12 |  <chem>CC(C)C(O)N1C(=O)N(C1)C(=O)N2C(=O)N(C2)C3=CC=CC=C3</chem>                                  | 65.3  |
| 16 | 29   |  <chem>CC(C)C(=O)N[C@@H](C)C(=O)N[C@@H](Cc1ccc(O)cc1)C(=O)N</chem>                              | 64.69 |
| 17 | 4    |  <chem>C1CCN(C1)C(=O)N[C@@H](Cc2ccccc2)C(=O)N1CCCC1</chem>                                     | 64.47 |
| 18 | 21   |  <chem>C1CCN(C1)C(=O)N[C@@H](Cc2ccccc2)C(=O)N1CCCC1</chem>                                     | 64.01 |
| 19 | MG5  |  <chem>COc1ccc2c(c1)c(c[nH]2)C3=CC=C(O)C=C3</chem>                                             | 62.84 |

|    |          |                                                                                     |       |
|----|----------|-------------------------------------------------------------------------------------|-------|
| 20 | 50       | 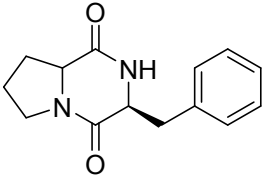   | 62.11 |
| 21 | 19       |    | 61.82 |
| 22 | 51       |    | 61.37 |
| 23 | 20       |    | 60.74 |
| 24 | MG10     |   | 59.65 |
| 25 | 9        |  | 59.2  |
| 26 | MGA<br>2 |  | 58.99 |
| 27 | MG7      |  | 58.38 |

|    |       |                                                                                                                                               |       |
|----|-------|-----------------------------------------------------------------------------------------------------------------------------------------------|-------|
| 28 | 14    | 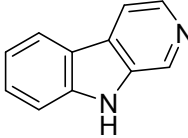 <chem>Cc1ccc2c(c1)c(c[nH]2)c3cccnc3</chem>                  | 57.8  |
| 29 | 36    |  <chem>Cc1cc(O)c(O)c(c1)C[C@H](O)C(=O)O</chem>               | 57.52 |
| 30 | 42    |  <chem>Cc1cc(O)c(O)c(c1)C[C@H](O)C(=O)N1C(=O)C(=O)N1</chem>  | 57.51 |
| 31 | 38    |  <chem>Cc1cc(O)c(O)c(c1)C[C@H](O)C(=O)O</chem>               | 57.39 |
| 32 | MG2-1 |  <chem>Cc1c2c(c3c1c[nH]3)C(=O)N2C(=O)N1C(=O)C(=O)N1</chem>  | 57.04 |
| 33 | 18    |  <chem>Cc1c2c(c3c1c[nH]3)C(=O)N2C(=O)N1C(=O)C(=O)N1</chem> | 56.47 |

|    |       |                                                                                     |       |
|----|-------|-------------------------------------------------------------------------------------|-------|
| 34 | MG4-1 | 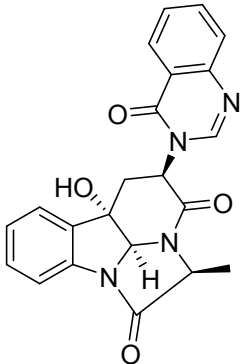   | 56.12 |
| 35 | 37    |    | 55.73 |
| 36 | 5     |    | 55.45 |
| 37 | 7     |   | 55.36 |
| 38 | 28    |  | 55.16 |
| 39 | 2     |  | 55.08 |

|    |          |                                                                                     |       |
|----|----------|-------------------------------------------------------------------------------------|-------|
| 40 | 11       | 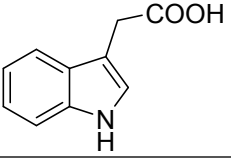   | 54.68 |
| 41 | MGA<br>1 |    | 53.36 |
| 42 | 33       |    | 53.07 |
| 43 | 10       |   | 52.24 |
| 44 | 12       |  | 52.21 |
| 45 | 47       |  | 50.8  |
| 46 | MG1      |  | 50.77 |
| 47 | 16       |  | 50.49 |



|    |       |                                                                                     |       |
|----|-------|-------------------------------------------------------------------------------------|-------|
| 48 | 17    | 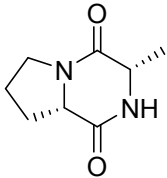   | 50.33 |
| 49 | 34    |    | 50.24 |
| 50 | 24    |    | 50.18 |
| 51 | 8     |    | 49.38 |
| 52 | MG4-2 |   | 47.87 |
| 53 | 44    |  | 46.2  |
| 54 | 26    |  | 45.88 |
| 55 | 15    |  | 44.32 |

|    |     |                                                                                                                                                                                       |       |
|----|-----|---------------------------------------------------------------------------------------------------------------------------------------------------------------------------------------|-------|
| 56 | 39  | 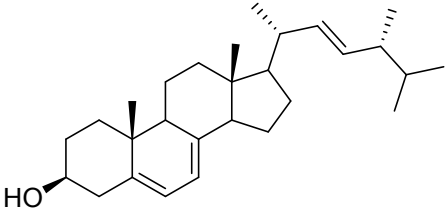 <chem>CC(C)C(C)C=C[C@H](C)C[C@H]1CC[C@@H]2[C@@]1(CC[C@H]3[C@H]2CC=C4[C@@]3(CC[C@@H](C4)O)C)C</chem> | 42.06 |
| 57 | 49  |  <chem>COC(=O)[C@H]1CC(=O)N1</chem>                                                                  | 41.01 |
| 58 | 43  |  <chem>C[C@H]1NC(=O)[C@@H]2[C@@H](C1)N(C(=O)N2)c3ccccc3</chem>                                       | 40.7  |
| 59 | MG8 |  <chem>CC(=O)OC[C@H]1[C@@H](C)N(C)[C@@H]2[C@@H](C1)C(=O)N=C2C</chem>                                | 40.41 |
| 60 | 31  |  <chem>NC1=NC=NC2=C1N=CN2</chem>                                                                   | 37.44 |
| 61 | 32  |  <chem>CC1=CN(C(=O)N1)C(=O)N</chem>                                                                | 36.19 |
| 62 | 27  |  <chem>CC(O)C(C)O</chem>                                                                           | 32.1  |

|    |    |                                                                                                                     |       |
|----|----|---------------------------------------------------------------------------------------------------------------------|-------|
| 63 | 30 | 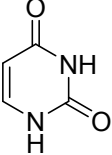<br><chem>C1=CN(C(=O)N1)C=O</chem> | 31.99 |
|----|----|---------------------------------------------------------------------------------------------------------------------|-------|

Table S2. The list of available inhibitors and FPL results.

| N <sup>o</sup> | PDB ID | Pulling Work                                                                                                                                                                                                                                                                                                                                                                                                                                             |
|----------------|--------|----------------------------------------------------------------------------------------------------------------------------------------------------------------------------------------------------------------------------------------------------------------------------------------------------------------------------------------------------------------------------------------------------------------------------------------------------------|
| 1              | 2QF6   | 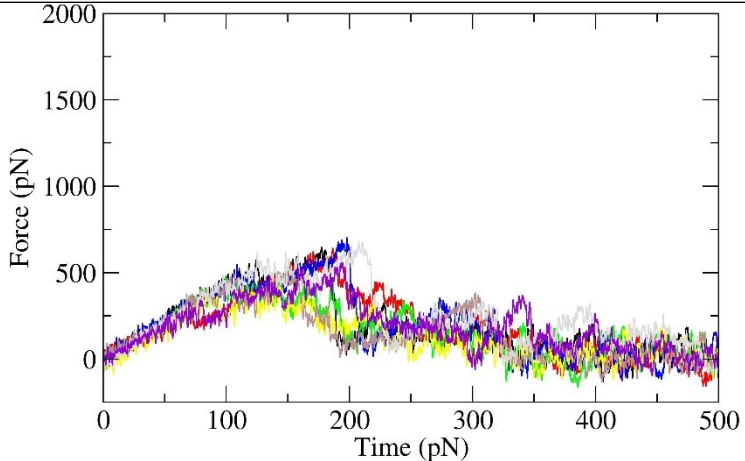 A line graph showing Force (pN) on the y-axis (0 to 2000) versus Time (pN) on the x-axis (0 to 500). Multiple colored lines represent different pulling work trials. The force increases from 0 to approximately 500 pN at 100 pN time, reaches a peak of about 600 pN at 200 pN time, and then drops to near 0 pN by 300 pN time, remaining low until 500 pN time.   |
| 2              | 2QG0   |  A line graph showing Force (pN) on the y-axis (0 to 2000) versus Time (pN) on the x-axis (0 to 500). Multiple colored lines represent different pulling work trials. The force increases from 0 to approximately 700 pN at 100 pN time, reaches a peak of about 1000 pN at 200 pN time, and then drops to near 0 pN by 300 pN time, remaining low until 500 pN time. |
| 3              | 2QG2   |  A line graph showing Force (pN) on the y-axis (0 to 2000) versus Time (pN) on the x-axis (0 to 500). Multiple colored lines represent different pulling work trials. The force increases from 0 to approximately 500 pN at 100 pN time, reaches a peak of about 700 pN at 200 pN time, and then drops to near 0 pN by 300 pN time, remaining low until 500 pN time. |

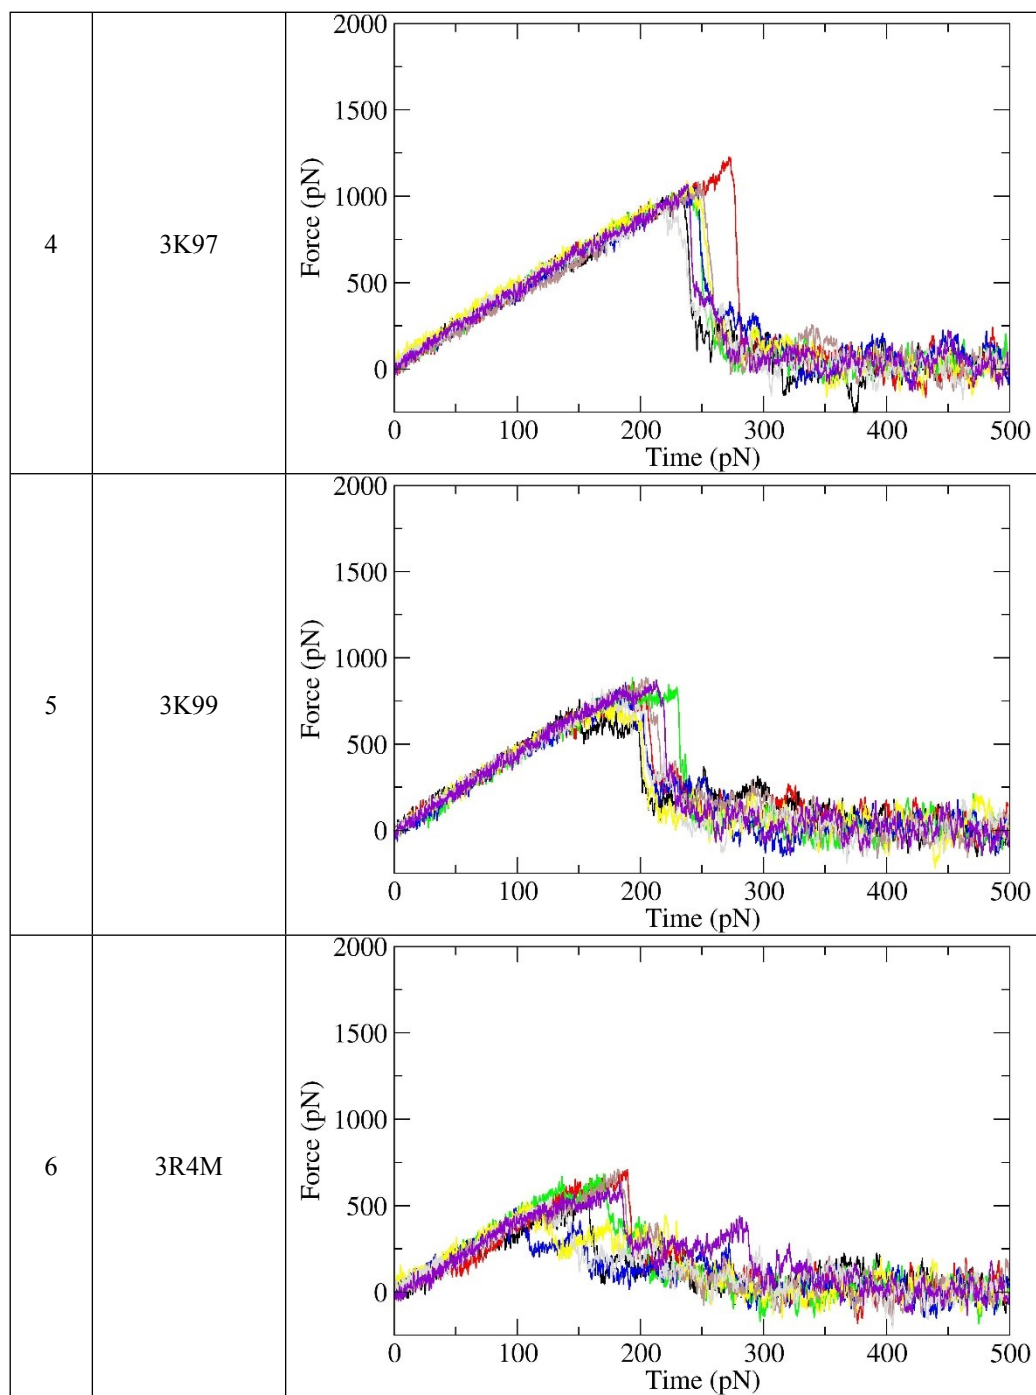

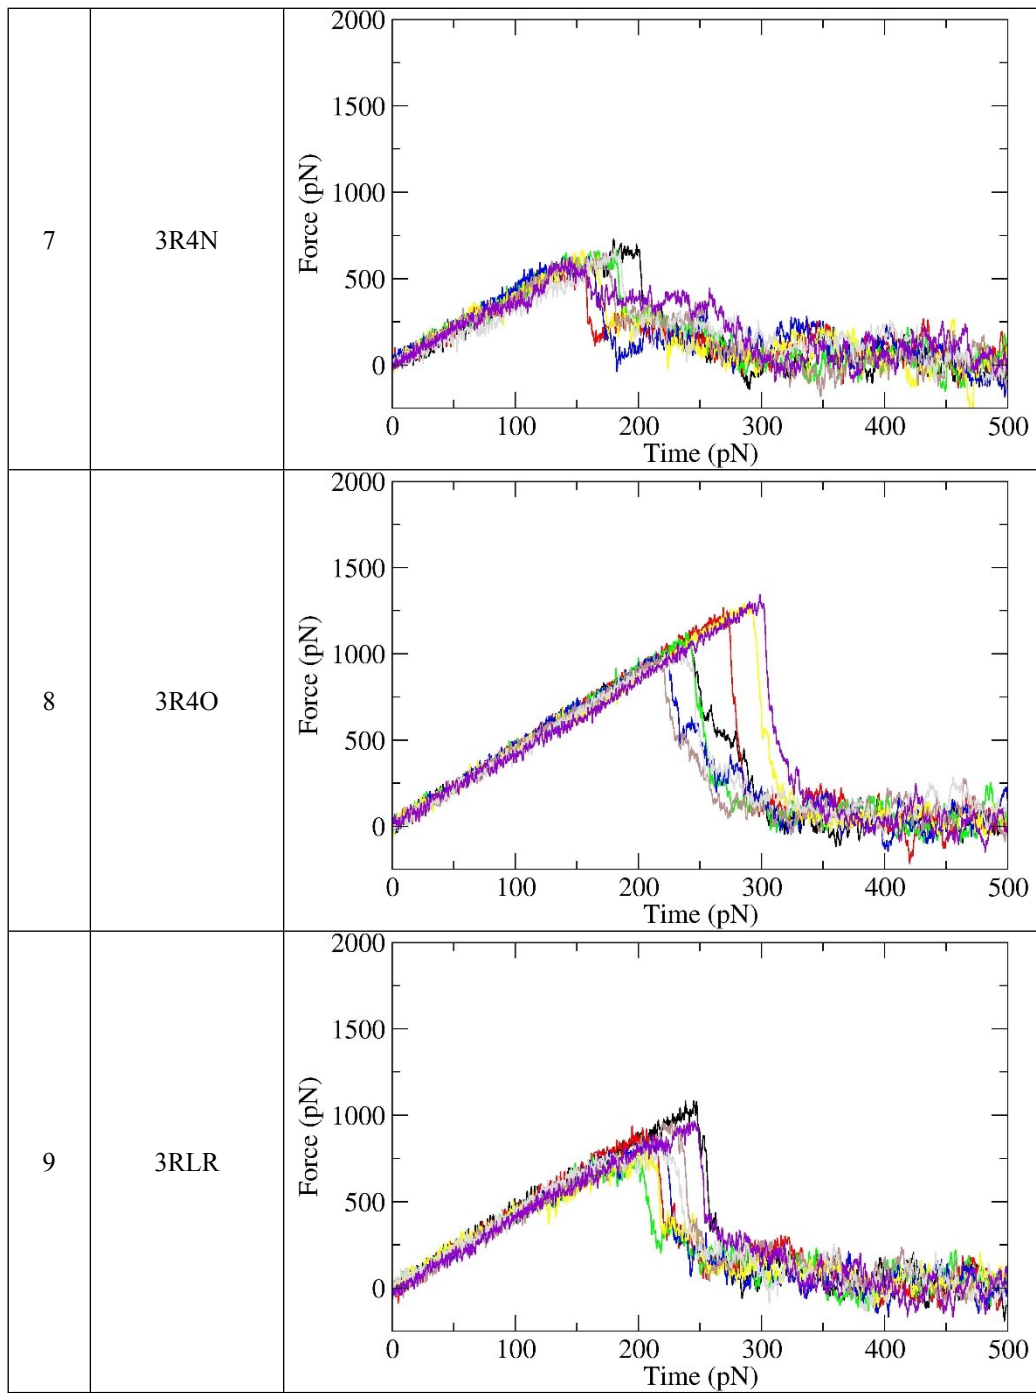

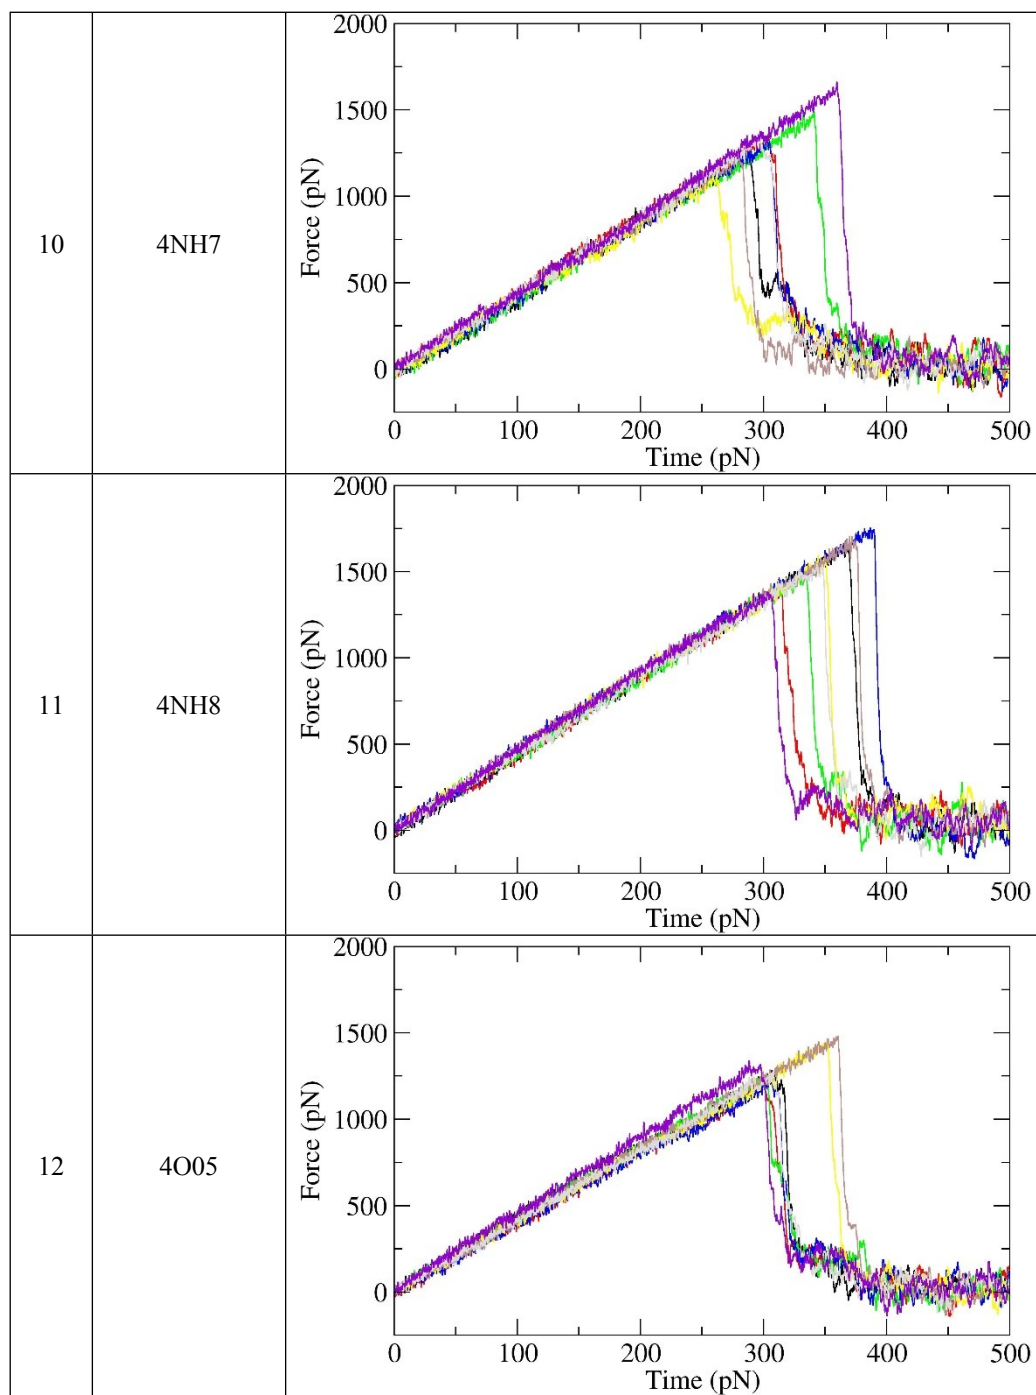

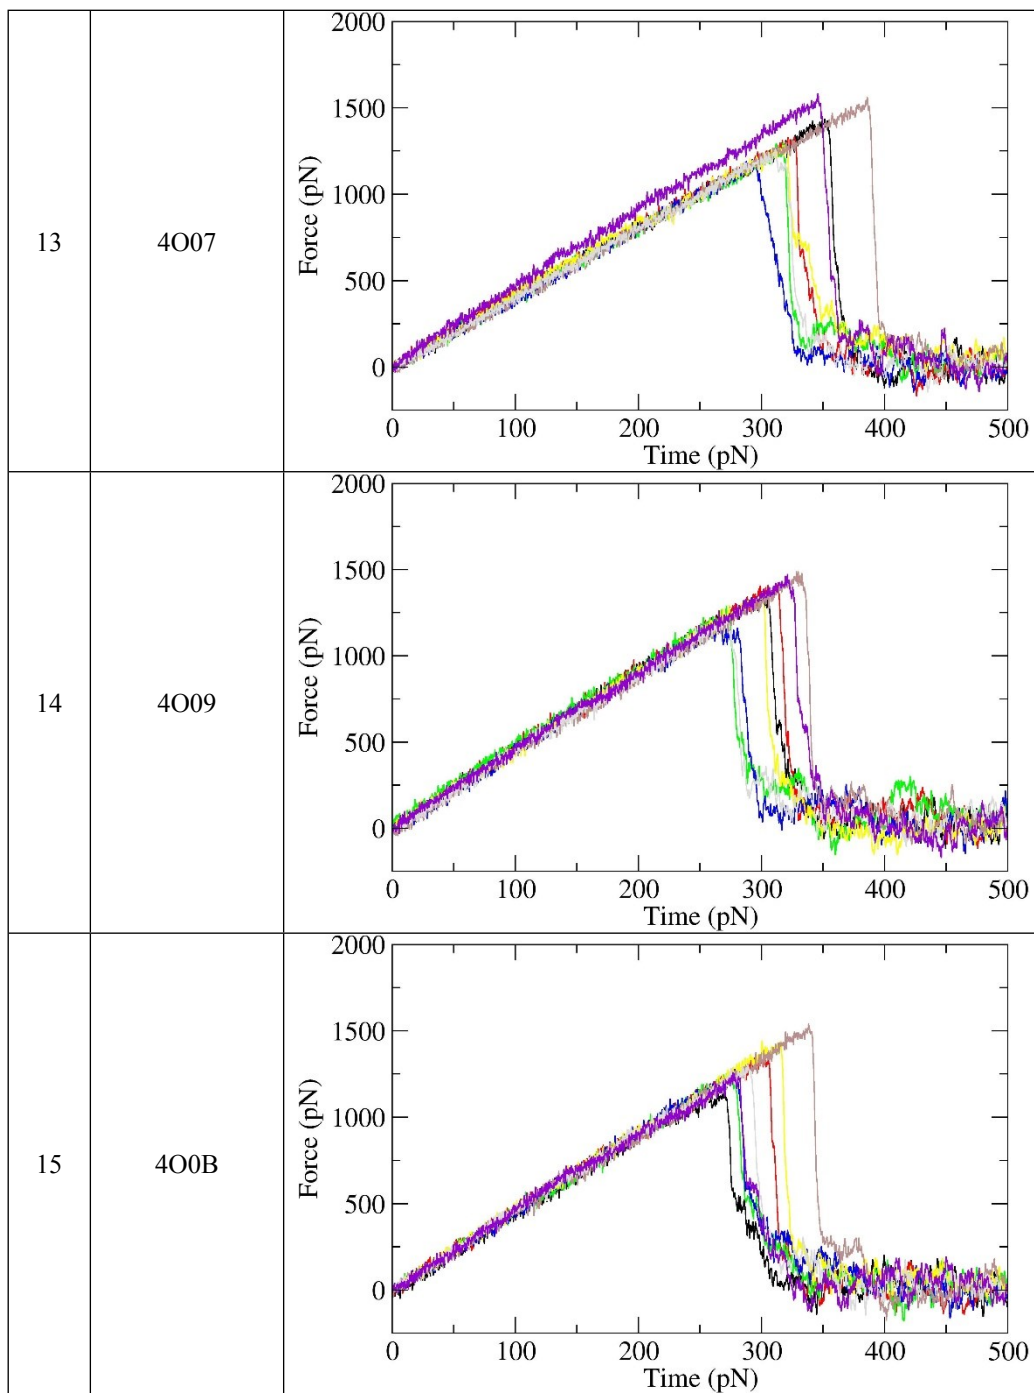



Table S3. The list of six top-lead marine compounds and FPL results.

| N <sup>o</sup> | Compound | Pulling Work                                                                         |
|----------------|----------|--------------------------------------------------------------------------------------|
| 1              | 48       | 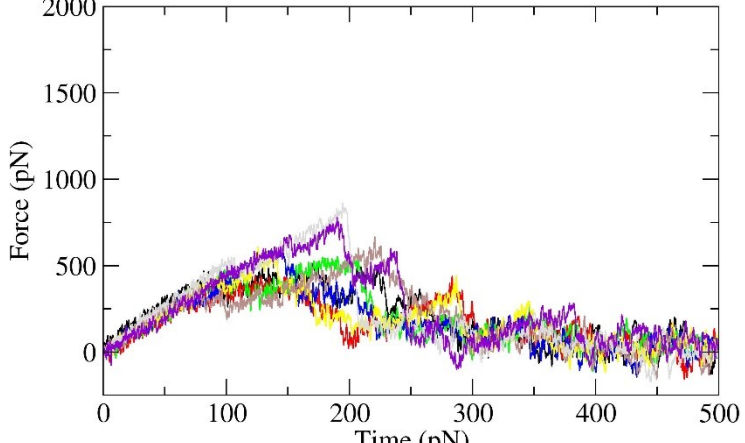   |
| 2              | 25       |   |
| 3              | 40       |  |

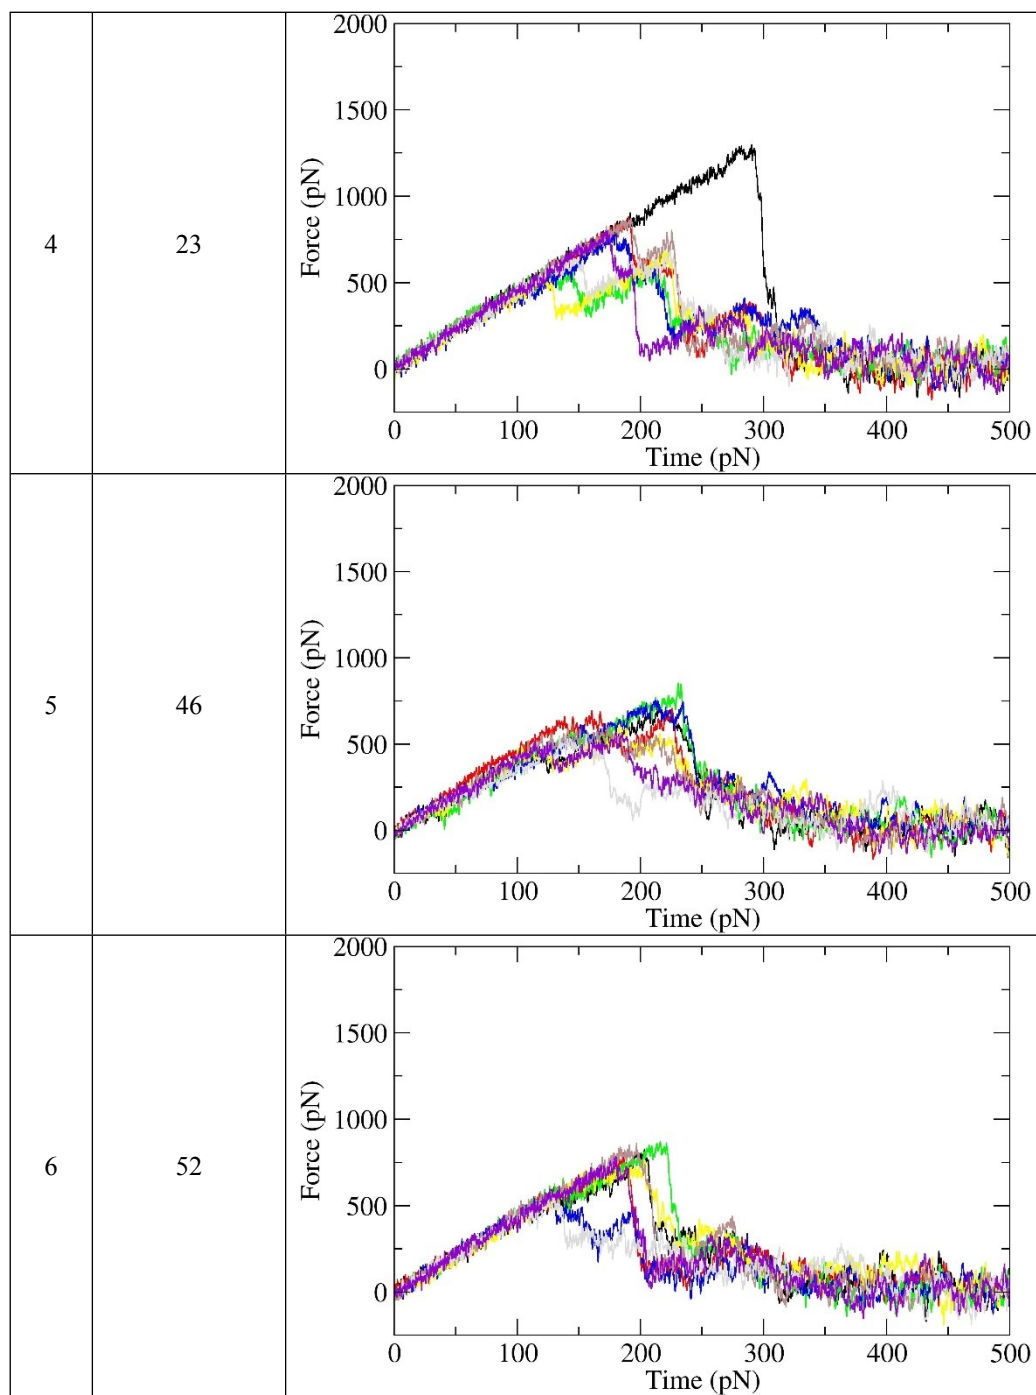

Table S4. All atom RMSD of Hsp90 + inhibitors over 8 independent MD trajectories with a length of 20 ns each.

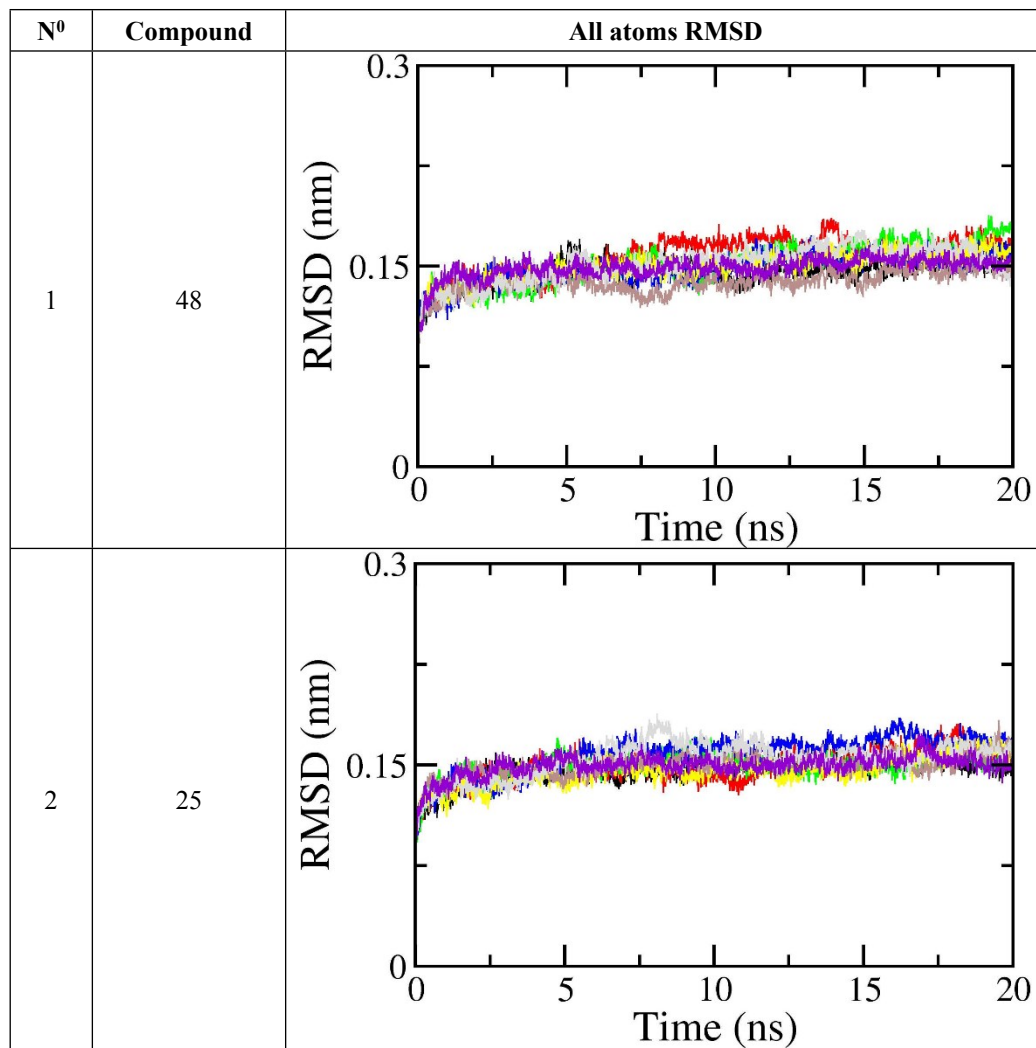

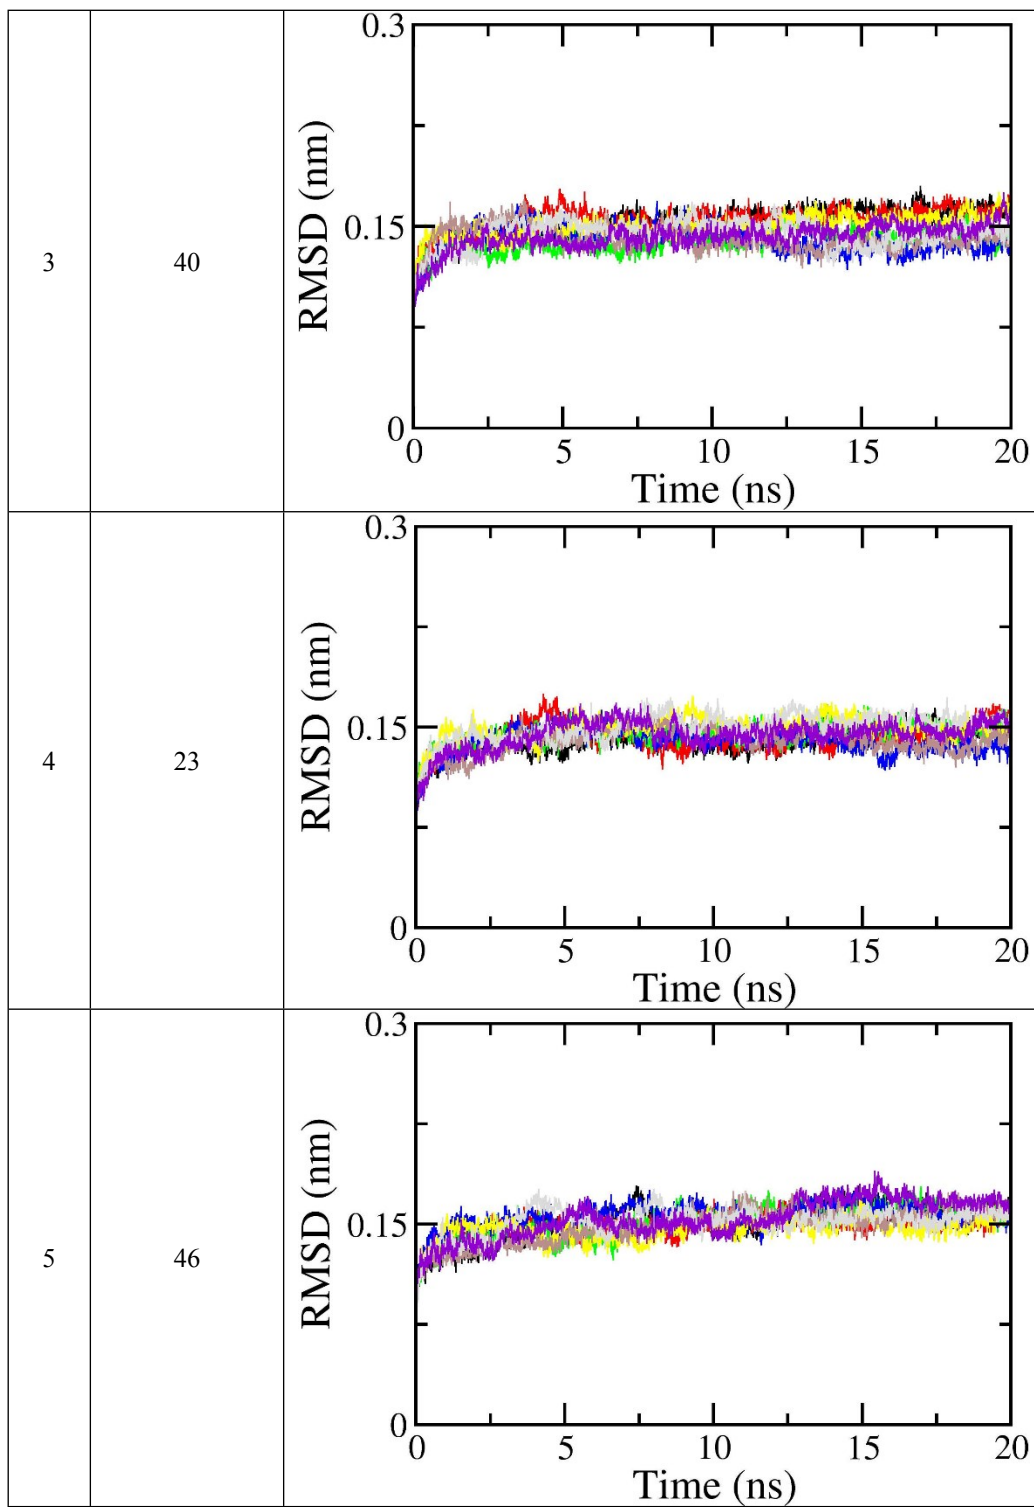

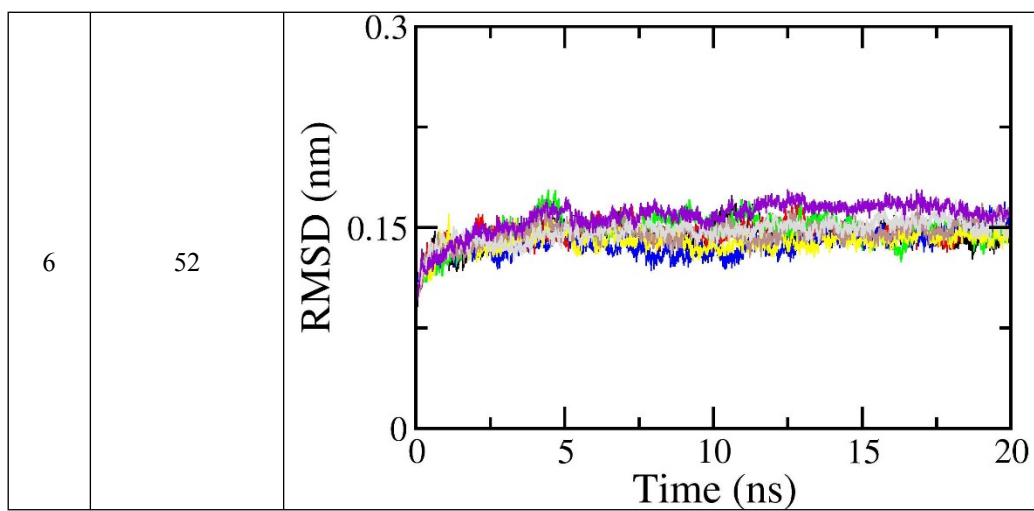

Table S5. The obtained values of the FPL calculations.

| <b>N<sup>o</sup></b> | <b>Name</b> | <b><math>F_{Max}^a</math></b> | <b><math>W^b</math></b> |
|----------------------|-------------|-------------------------------|-------------------------|
| 1                    | <b>48</b>   | 662.2 ± 49.3                  | 71.0 ± 4.5              |
| 2                    | <b>25</b>   | 548.3 ± 30.7                  | 56.2 ± 2.4              |
| 3                    | <b>40</b>   | 749.3 ± 32.1                  | 81.2 ± 4.2              |
| 4                    | <b>23</b>   | 973.9 ± 76.0                  | 108.1 ± 6.9             |
| 5                    | <b>46</b>   | 860.4 ± 59.0                  | 95.0 ± 9.0              |
| 6                    | <b>52</b>   | 658.6 ± 45.4                  | 63.5 ± 5.2              |

<sup>a</sup>The obtained value of the mean rupture force  $F_{Max}$  and <sup>b</sup>the recorded metric of the pulling work  $W$ . The calculated error was the standard error of the average. The unit of force, energy, and inhibition constant is in pN, kcal mol<sup>-1</sup> and μM, respectively.

Table S6. The list of six top-lead marine compounds and FPL results.

| N <sup>o</sup> | Compound | Pulling Work                                                                                                                                                                                                                                                                                                                                                                                                                                           |
|----------------|----------|--------------------------------------------------------------------------------------------------------------------------------------------------------------------------------------------------------------------------------------------------------------------------------------------------------------------------------------------------------------------------------------------------------------------------------------------------------|
| 1              | 48       | 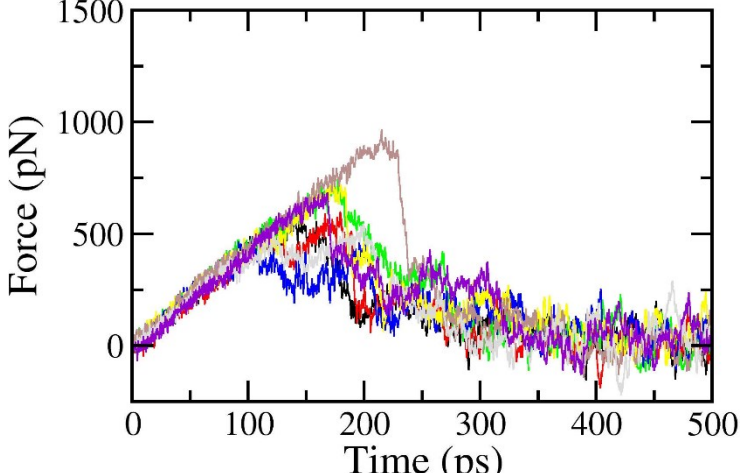 A line graph showing Force (pN) on the y-axis (0 to 1500) versus Time (ps) on the x-axis (0 to 500). Multiple colored lines represent individual pulling work trials. The force generally increases from 0 to a peak of approximately 800-1000 pN between 150 and 250 ps, then decreases and stabilizes around 200-500 pN for the remainder of the 500 ps duration. |
| 2              | 25       |  A line graph showing Force (pN) on the y-axis (0 to 1500) versus Time (ps) on the x-axis (0 to 500). Multiple colored lines represent individual pulling work trials. The force increases to a peak of approximately 500-700 pN between 100 and 200 ps, then decreases and stabilizes around 200-500 pN for the remainder of the 500 ps duration.                  |
| 3              | 40       |  A line graph showing Force (pN) on the y-axis (0 to 1500) versus Time (ps) on the x-axis (0 to 500). Multiple colored lines represent individual pulling work trials. The force increases to a peak of approximately 800-1000 pN between 150 and 250 ps, then decreases and stabilizes around 200-500 pN for the remainder of the 500 ps duration.                |

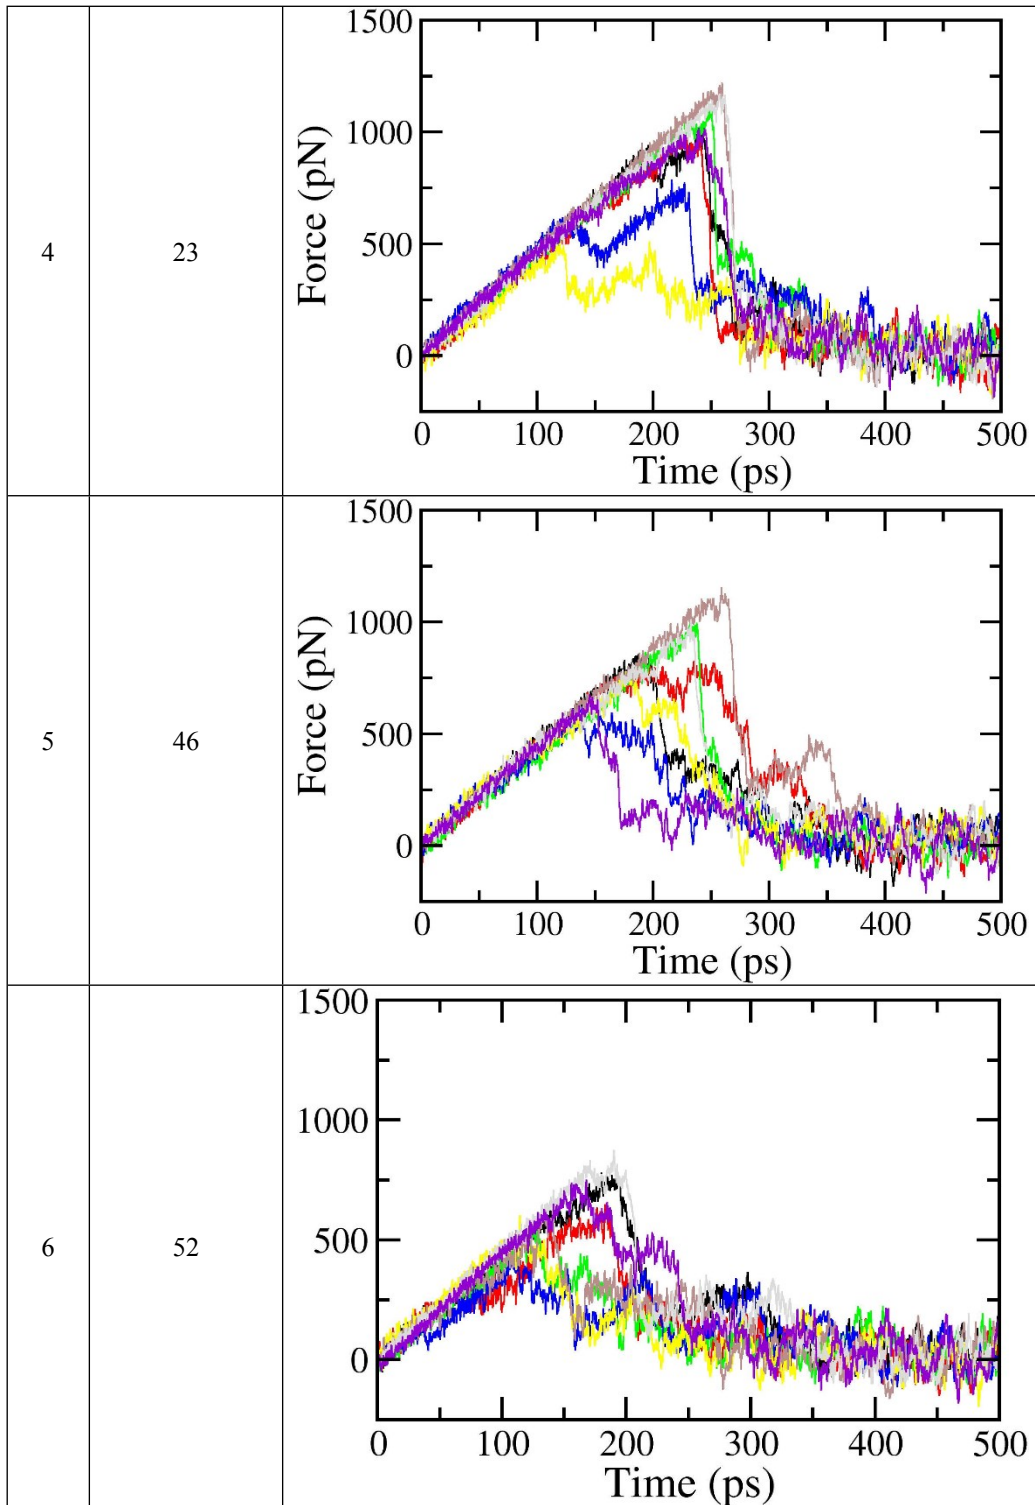

Supplement: RA-011-D1RA01855H-s001.pdf [file RA-011-D1RA01855H-s001.pdf]
